# Supplementary material for: Expectations of pain and functioning in patients with musculoskeletal disorders: a cross-sectional study
Source: Springer Nature journal article supplement (doi:10.1186/s12891-016-1386-z), 2017-01-26
Supplement: MOESM1 [file 12021400]

**YOUR EXPECTATIONS - (- after doctor appointment)**

(PSFS.)

Compared with now, I think **my shoulder problem overall** next month will be:

- Much worse       Worse       A little worse       The same       Better       Much better

Compared with now, I expect my **shoulder pain** next month will be:

- Much worse       Worse       A little worse       The same       Better       Much better

Compared with now, I expect my **ability to use and move my shoulder** next month will be:

- Much worse       Worse       A little worse       The same       Better       Much better
