# Supplementary material for: Expectations of pain and functioning in patients with musculoskeletal disorders: a cross-sectional study
Source: Springer Nature journal article supplement (doi:10.1186/s12891-016-1386-z), 2017-01-26
Supplement: MOESM2 [file 12021400]

**Classification of neck/back diagnoses**

| ICD-10  | 1. Specific                                                 |
|---------|-------------------------------------------------------------|
|         | <i>Neurogenic</i>                                           |
|         | <i>Other pathology (inflammation, cancer, trauma +)</i>     |
| 40.0-.9 | Deforming back conditions                                   |
| 41.0-.9 | Scoliosis                                                   |
| 42.0-.9 | Spinal osteochondrosis                                      |
| 43.0-.9 | Other deforming dorsopathies                                |
| 45.0-.9 | Ankylosing spondylitis                                      |
| 46.0-.9 | Inflammatory conditions                                     |
| 47.0-9  | Spondylosis                                                 |
| 48.0-.9 | Other spondylopathies                                       |
| 49.0-.9 | Spondylopathies in diseases classified elsewhere            |
| 50.0-.9 | Cervical disk disorder                                      |
| 51.0-.9 | Other intervertebral disc disorder                          |
| 53.9    | Dorsopathy, unspecified                                     |
| 54.0    | Panniculitis affecting regions of neck and back             |
| XIX     | Injury, poisoning and other consequences of external causes |
|         | <b>2. Unspecific</b>                                        |
|         | <i>Unspecific back-pain</i>                                 |
| 48.8    | Other specified spondylopathies                             |
| 50.9    | Cervical disc disorder, unspecified                         |
| 51.9    | Intervertebral disc disorder, unspecified                   |
| 53.0    | Cervicocranial syndrome                                     |
| 53.1    | Cervicobrachial syndrome                                    |
| 53.2    | Spinal instabilities                                        |
| 53.3    | Sacrococcygeal disorders, not elsewhere classified          |
| 53.8    | Other specified dorsopathies                                |
| 54.1    | Radiculopathy                                               |
| 54.2    | Cervicalgia                                                 |
| 54.3    | Sciatica                                                    |
| 54.4    | Lumbago with sciatica                                       |
| 54.5    | Low back pain                                               |
| 54.6    | Pain in thoracic spine                                      |
| 54.8    | Other dorsalgia                                             |
| 54.9    | Dorsalgia, unspecified                                      |
| 25.5    | Pain in joint                                               |
| 79.1    | Myalgia                                                     |

Comments: Specific - unspecific neck/back diagnoses:

- There is a code .9 in many chapters, which are considered specific. These diagnoses have a defined origin, since they are ordered in a chapter-
- "Diseases classified elsewhere" are considered the same way.
- In cases of doubt where the patient journal evaluated.

Source: www.formi.no

### Classification of shoulder diagnoses

|         |                                                        |
|---------|--------------------------------------------------------|
| ICD-10  | Group 1<br><b>SUBACROMIAL CONDITIONS</b>               |
| 75      | <i>Shoulder lesions</i>                                |
| 75.1    | Rotator cuff syndrome                                  |
| 75.2    | Bicipital tendinitis                                   |
| 75.3    | Calcific tendinitis of shoulder                        |
| 75.4    | Impingement syndrome of shoulder                       |
| 75.5    | Bursitis of shoulder                                   |
|         | Group 2<br><b>ADHESIV CAPSULITIS</b>                   |
| 75.0    | Adhesive capsulitis of shoulder                        |
|         | Group 3<br><b>DEGENERATIVITY/ARTROSIS</b>              |
| 15-19   | Arthrosis                                              |
| 15.0-.9 | Polyarthrosis                                          |
| 19.0-.9 | Other arthrosis                                        |
|         | Group 4<br><b>OTHER CONDITIONS</b>                     |
| 0-3     | <b><i>Infectious arthropathies</i></b>                 |
| 00.0-.9 | Pyogenic arthritis                                     |
| 01.0-.9 | Direct inf. of joint in inf./parasitic dis. clas. els. |
| 02.0-.9 | Reactive arthropathies                                 |
| 03.0-.9 | Postinfective and reactive                             |
| 0.5-14  | <b><i>Inflammatory polyarthropathies</i></b>           |
| 0.5-.9  | Seropositive rheumatoid arthritis                      |
| 0.6-.9  | Other rheumatoid arthritis                             |
| 0.7-.9  | Psoriatic and enteropathic arthropathies               |
| 0.8-.9  | Juvenile rheumatoid arthritis                          |
| 10.0-.9 | Gout                                                   |
| 11.0-.9 | Other crystal arthropathies                            |
| 12.0-.9 | Other specific arthropathies                           |
| 13.0-.9 | Other arthritis                                        |
| 14.0-.9 | Arthropathies in other diseases clas. els.             |
| 20-25   | <b><i>Other joint disorders</i></b>                    |
| 30-36   | <b><i>Systemic connective tissue disorders</i></b>     |
| 30.0-.9 | Polyarteritis nodosa                                   |
| 31.0-.9 | Other necrotizing vasculopathies                       |
| 32.0-.9 | Systemic lupus erythematosus                           |

|           |                                                             |
|-----------|-------------------------------------------------------------|
| 33.0-.9   | Dermatopolymyositis                                         |
| 34.0-.9   | Systemic sclerosis                                          |
| 35.0-.9   | Other systemic involvement of connective tissue             |
| 36.0-.9   | Systemic connective tissue in dis. clas. els.               |
| 60-79     | <b>Soft tissue disorders</b>                                |
| 60-63     | <b>Disorders of muscles</b>                                 |
| 60.0-.9   | Myositis                                                    |
| 61.0-.9   | Calcification and ossification of muscle                    |
| 62.0-.9   | Other disorders of muscle                                   |
| 63.0-.9   | Disorders of muscle in diseases clas. els.                  |
| 65-68     | <b>Disorders of synovium and tendon</b>                     |
| 65.0-.9   | Synovitis and tenosynovitis                                 |
| 66.0-.9   | Spontaneous rupture of synovium and tendon                  |
| 67.0-.9   | Other disorders of synovium and tendon                      |
| 70-79     | <b>Other soft tissue disorders</b>                          |
| 70.0-.9   | Soft tissue disorders related to use, overuse               |
| 71.0-.9   | Other bursopathies                                          |
| 72.0-.9   | Fibroblastic disorders                                      |
| 73.0-.9   | Soft tissue disorders indiseases clas. els.                 |
| 75.8      | Other shoulder lesions                                      |
| 75.9      | Shoulder lesion, unspecified                                |
| 79.0      | Other soft tissue disorders, not els. clas.                 |
| 80-84     | <b>Osteopathies</b>                                         |
| 80.0-83.9 | Osteoporosis with pathological fracture                     |
| 84.0      | Malunion of fracture                                        |
| 85.0      | Fibrous dysplasia                                           |
| 86-90     | <b>Other boneconditions</b>                                 |
| 86.0-.9   | Osteomyelitis                                               |
| 87.0-.9   | Osteonecrosis                                               |
| 88.0-.9   | Paget's disease of bone                                     |
| 89.0-.9   | Algoneurodystrophy                                          |
| 90.0-.9   | Osteopathies in diseases clas. els.                         |
| 91-94     | <b>Chondropathies</b>                                       |
| 93.0-94.9 | Other osteochondropathies                                   |
| 95-99     | <b>Other disorders of the MSS and connective tissue</b>     |
| 95.0-.9   | Acquired deformities                                        |
| 96.0-.9   | Pseudarthrosis after fusion or arthrodesis                  |
| 99.0-.9   | Biomechanical lesions, not clas. els.                       |
| XIX       | Injury, poisoning and other consequences of external causes |
| S40-49    | Injuries to the shoulder and upper arm                      |

clas. els.: classified elsewhere

Source:

- Niels Gunnar Juel

- Cecilie Røe
